# Supplementary material for: A single-beam NIR laser-triggered full-color upconversion tuning of a Er/Tm:CsYb2F7@glass photothermal nanocomposite for optical security
Source: Royal Society of Chemistry journal article supplement (doi:10.1039/d1nr08535b), 2022-01-01
Supplement: d1nr08535b1.pdf [file d1nr08535b1.pdf]

**A single-beam NIR laser triggered full-color upconversion tuning of  
Er/Tm: CsYb<sub>2</sub>F<sub>7</sub>@glass photothermal nanocomposite for optical  
security**

Jiwen Zhu <sup>a,b</sup>, Shaoxiong Wang <sup>a,\*</sup>, Zezhong Yang <sup>a</sup>, Shengxiang Liao <sup>a</sup>, Jidong Lin <sup>a</sup>,  
Hurong Yao <sup>a,\*</sup>, Feng Huang <sup>a, c, d</sup>, Yuanhui Zheng <sup>b,e</sup>, Daqin Chen <sup>a,b,c,d \*</sup>

<sup>a</sup> College of Physics and Energy, Fujian Normal University, Fujian Provincial Key Laboratory of Quantum Manipulation and New Energy Materials, Fuzhou, 350117, China

<sup>b</sup> Fujian Science & Technology Innovation Laboratory for Optoelectronic Information, Fuzhou, 350116, China

<sup>c</sup> Fujian Provincial Collaborative Innovation Center for Advanced High-Field Superconducting Materials and Engineering, Fuzhou, 350117, China

<sup>d</sup> Fujian Provincial Engineering Technology Research Center of Solar Energy Conversion and Energy Storage, Fuzhou, 350117, China

<sup>e</sup> College of Chemistry, Fuzhou University, Fuzhou, 350116, China

**Table S1** Color coordinates for laser power dependent UC luminescence yielded from the Tm/Er: CsYb<sub>2</sub>F<sub>7</sub>@glass under the irradiation of 980 nm laser.

| Laser power density (W/cm <sup>2</sup> ) | 0.25%Tm-0.25%Er |        | 0.25%Tm-0.5%Er |        | 0.25%Tm-0.75%Er |        | 0.25%Tm-1%Er |        |
|------------------------------------------|-----------------|--------|----------------|--------|-----------------|--------|--------------|--------|
|                                          | CIE x           | CIE y  | CIE x          | CIE y  | CIE x           | CIE y  | CIE x        | CIE y  |
| 33                                       | 0.2314          | 0.1686 | 0.3435         | 0.2703 | 0.3908          | 0.3107 | 0.4121       | 0.3411 |
| 51                                       | 0.2872          | 0.2463 | 0.3548         | 0.3216 | 0.3955          | 0.3443 | 0.4221       | 0.3707 |
| 70                                       | 0.3354          | 0.3029 | 0.3611         | 0.3862 | 0.3992          | 0.3919 | 0.4258       | 0.4091 |
| 89                                       | 0.339           | 0.3509 | 0.3512         | 0.4525 | 0.3884          | 0.4405 | 0.409        | 0.463  |
| 108                                      | 0.3276          | 0.4253 | 0.3164         | 0.5373 | 0.3549          | 0.5064 | 0.3598       | 0.5337 |
| 126                                      | 0.3041          | 0.4927 | 0.291          | 0.5874 | 0.3228          | 0.5549 | 0.3074       | 0.5934 |
| 146                                      | 0.2916          | 0.5337 | 0.2954         | 0.5913 | 0.3021          | 0.5891 | 0.282        | 0.6305 |

**Table S2** Color coordinates for laser power dependent UC luminescence yielded from the Er/Tm: CsYb<sub>2</sub>F<sub>7</sub> NCs@glass after covering with a cut-off optical filter above 495 nm pass-through.

| Laser power density (W/cm <sup>2</sup> ) | CIE x  | CIE y  |
|------------------------------------------|--------|--------|
| 33                                       | 0.5922 | 0.3909 |
| 51                                       | 0.5362 | 0.4408 |
| 70                                       | 0.5006 | 0.4722 |
| 89                                       | 0.4766 | 0.4944 |
| 108                                      | 0.4437 | 0.5244 |
| 126                                      | 0.3975 | 0.5663 |
| 146                                      | 0.3626 | 0.5983 |

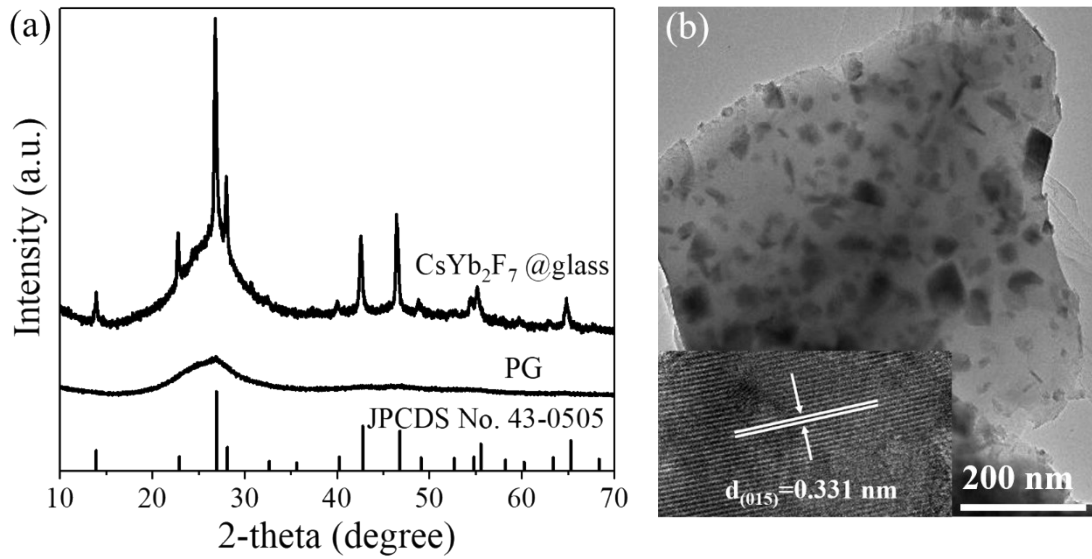

**Fig. S1.** (a) XRD patterns of PG and CsYb<sub>2</sub>F<sub>7</sub> NCs@glass prepared by heating PG at 900 °C for 2 h. (b) TEM image of a typical CsYb<sub>2</sub>F<sub>7</sub> NCs@glass sample, inset is the corresponding HRTEM image.

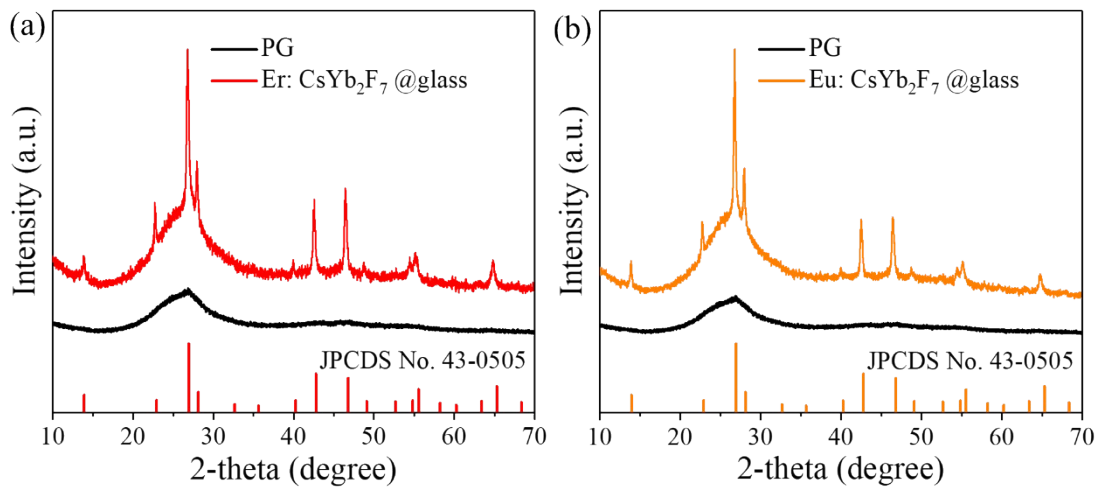

**Fig. S2.** XRD patterns of (a) Er and (b) Eu doped PG and CsYb<sub>2</sub>F<sub>7</sub> NCs@glass samples prepared by annealing PGs at 900 °C for 2 h.

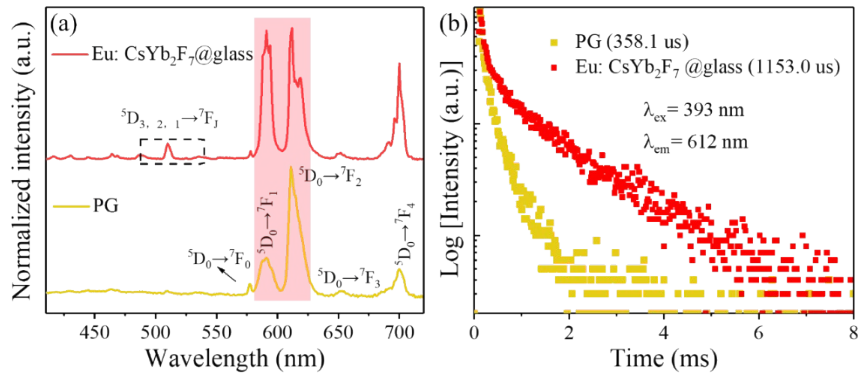

**Fig. S3.** (a) PL spectra ( $\lambda_{\text{ex}} = 393$  nm) of Eu-doped PG and CsYb<sub>2</sub>F<sub>7</sub> NCs@glass and (b) the corresponding decay curves by monitoring Eu<sup>3+</sup>: <sup>5</sup>D<sub>0</sub>→<sup>7</sup>F<sub>2</sub> transition (612 nm).

The present NCs@glass composites were prepared by heating precursor glasses. Therefore, after glass crystallization, the crystal-field environment around Eu<sup>3+</sup> is altered from amorphous aluminosilicate glass with large phonon energy and low symmetry into CsYb<sub>2</sub>F<sub>7</sub> crystal lattice with low phonon energy and high symmetry. Consequently, the decrease of the intensity ratio between <sup>5</sup>D<sub>0</sub>→<sup>7</sup>F<sub>2</sub> electric-dipole transition and <sup>5</sup>D<sub>0</sub>→<sup>7</sup>F<sub>1</sub> magnetic-dipole one is mainly ascribed to the change of the crystal-field environment around Eu<sup>3+</sup> from amorphous aluminosilicate glass into crystal lattice.

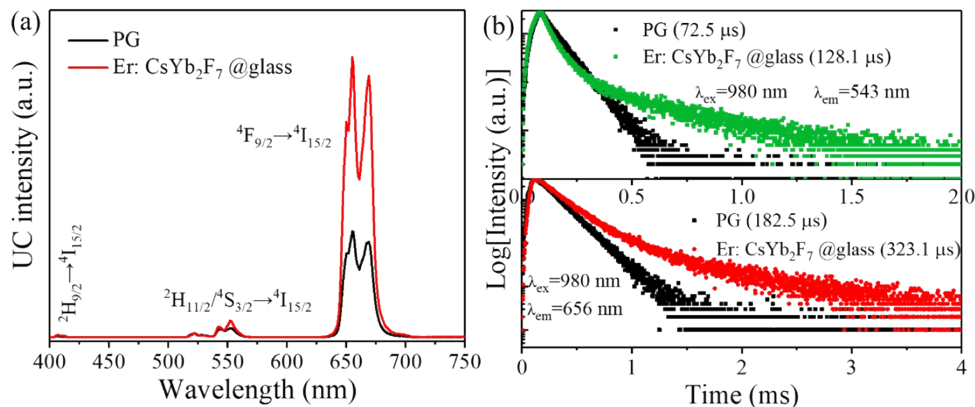

**Fig. S4.** (a) UC emission spectra of Er-doped PG and CsYb<sub>2</sub>F<sub>7</sub> NCs@glass samples irradiated by 980 nm laser and (b) the corresponding decay curves by monitoring Er<sup>3+</sup>: <sup>4</sup>S<sub>3/2</sub>→<sup>4</sup>I<sub>15/2</sub> (543 nm) and <sup>4</sup>F<sub>9/2</sub>→<sup>4</sup>I<sub>15/2</sub> (656 nm) transitions, respectively.

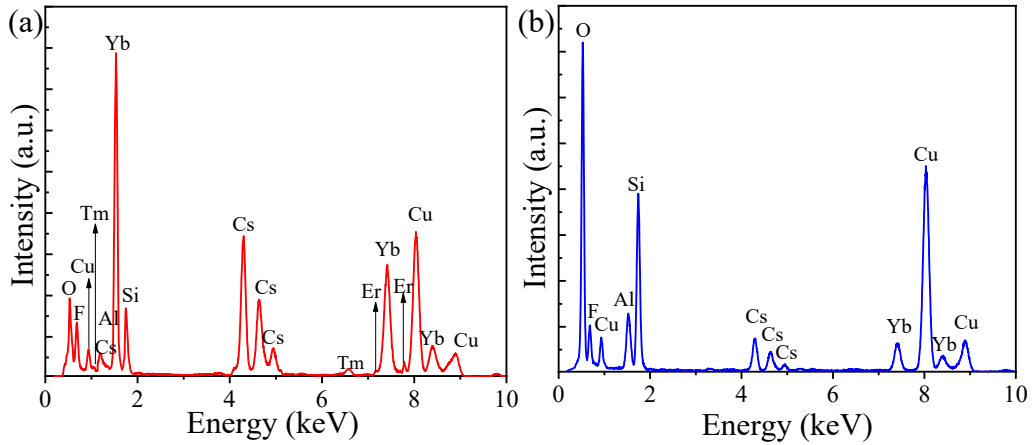

**Fig. S5.** EDX spectra from (a) an individual  $\text{CsYb}_2\text{F}_7$  NC and (b) glass matrix in the Er/Tm co-doped  $\text{CsYb}_2\text{F}_7$  NCs@glass composite. The Cu peaks are originated from the copper grid supporting the TEM sample.

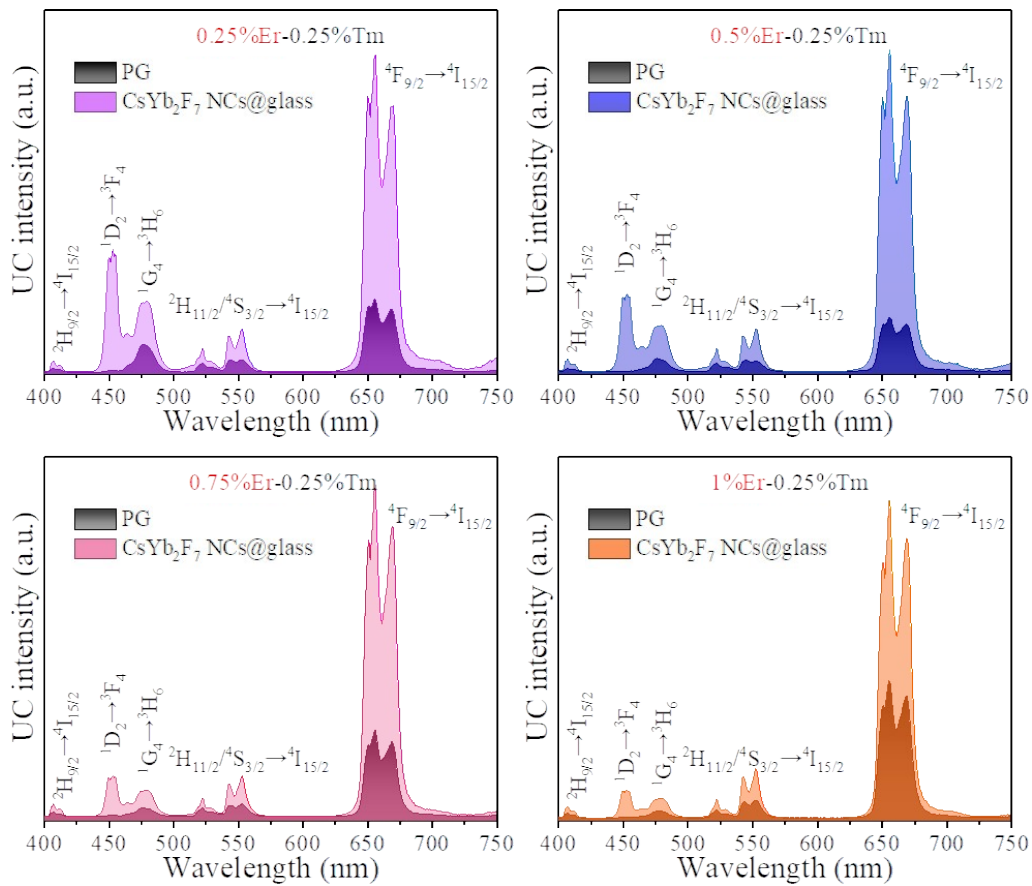

**Fig. S6.** UC emission spectra of Er/Tm co-doped PG and  $\text{CsYb}_2\text{F}_7$  NCs@glass samples with various  $\text{Er}^{3+}$  contents and fixed  $\text{Tm}^{3+}$  content irradiated by 980 nm laser.

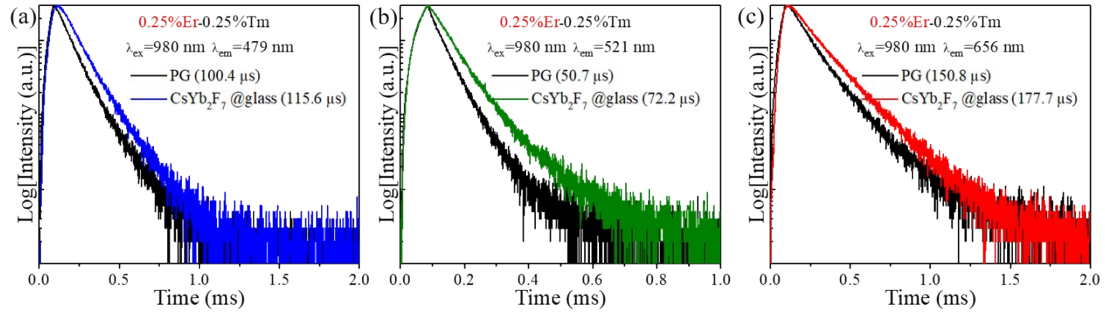

**Fig. S7.** UC decay curves of Er/Tm co-doped PG and CsYb<sub>2</sub>F<sub>7</sub> NCs@glass by monitoring (a) Tm<sup>3+</sup>: <sup>1</sup>G<sub>4</sub>→<sup>3</sup>H<sub>6</sub> (479 nm), (b) Er<sup>3+</sup>: <sup>2</sup>H<sub>11/2</sub>,<sup>4</sup>S<sub>3/2</sub>→<sup>4</sup>I<sub>15/2</sub> (521 nm), and (c) Er<sup>3+</sup>: <sup>4</sup>F<sub>9/2</sub>→<sup>4</sup>I<sub>15/2</sub> (656 nm) transitions, respectively.

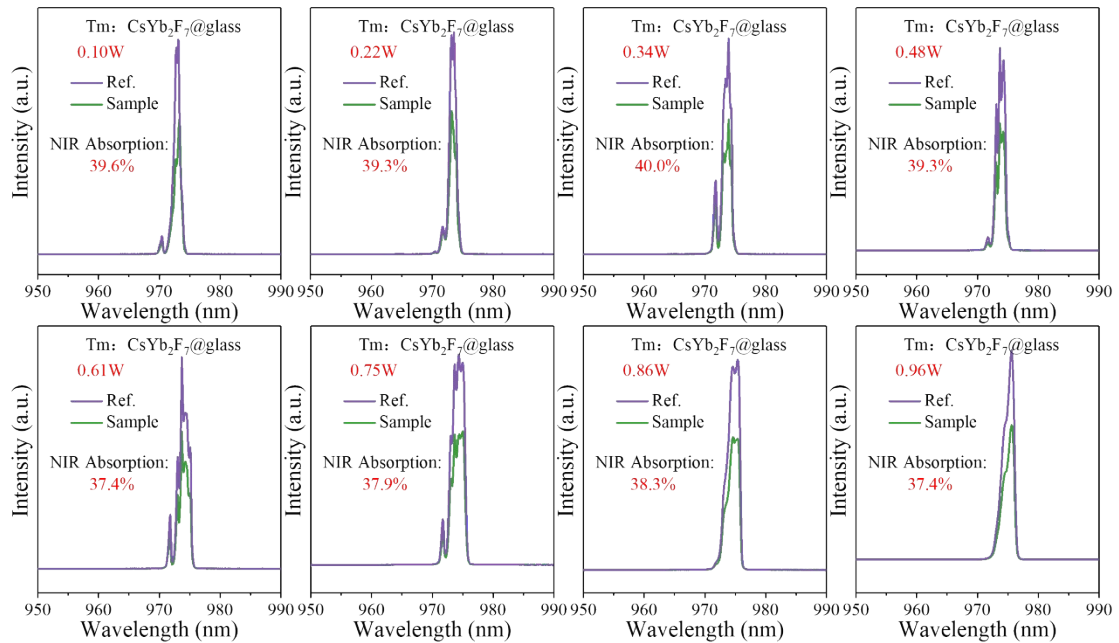

**Fig. S8.** Quantitative scattering spectra of Tm: CsYb<sub>2</sub>F<sub>7</sub> NCs@glass and the reference for absolute absorption measurement of 980 nm laser with different laser powers.

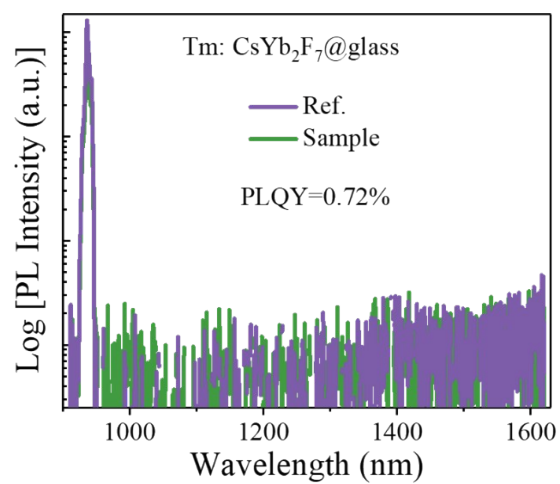

**Fig. S9.** Quantitative NIR PL spectra of Tm: CsYb<sub>2</sub>F<sub>7</sub> NCs@glass and the reference for absolute PLQY determination.

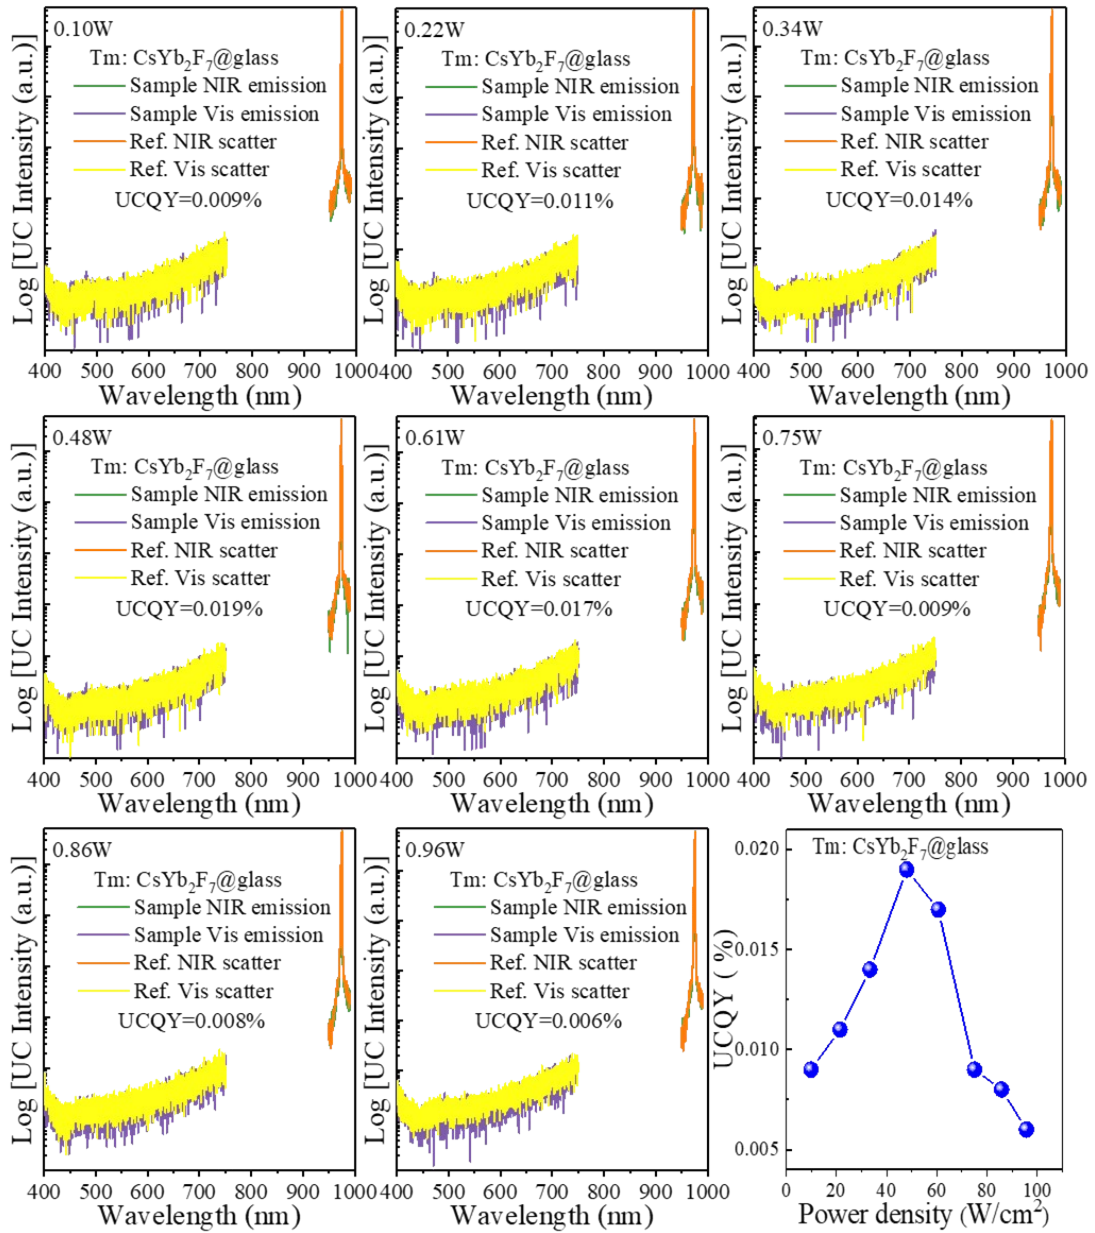

**Fig. S10.** Quantitative UC emission spectra of Tm: CsYb<sub>2</sub>F<sub>7</sub> NCs@glass and the reference for UCQY determination by using different laser powers.



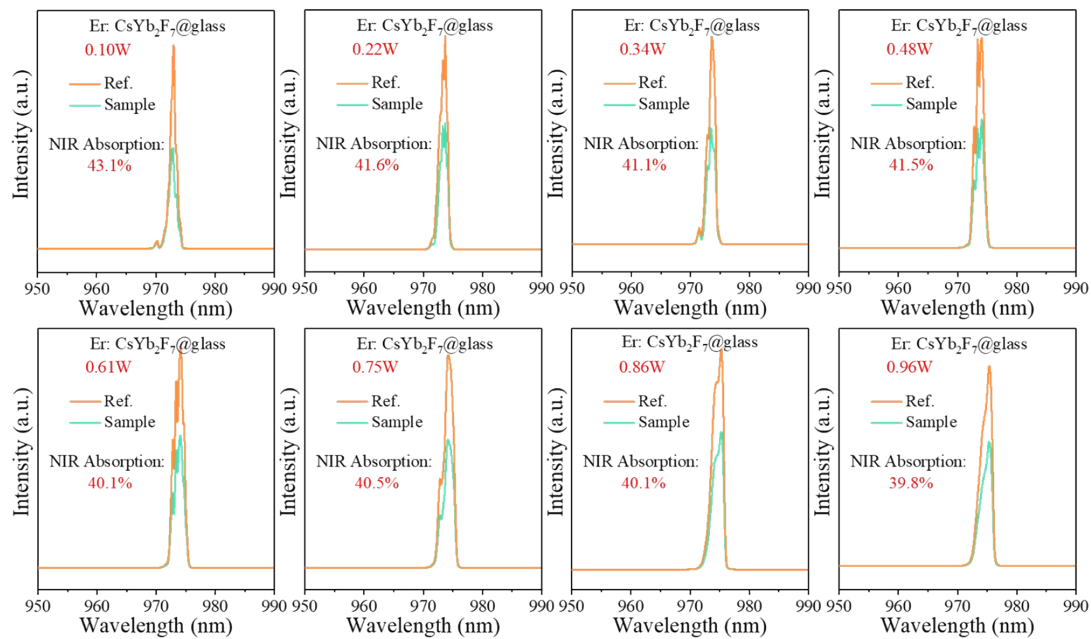

**Fig. S11.** Quantitative scattering spectra of Er: CsYb<sub>2</sub>F<sub>7</sub>@glass and the reference for absolute absorption measurement of 980 nm laser with various laser powers.

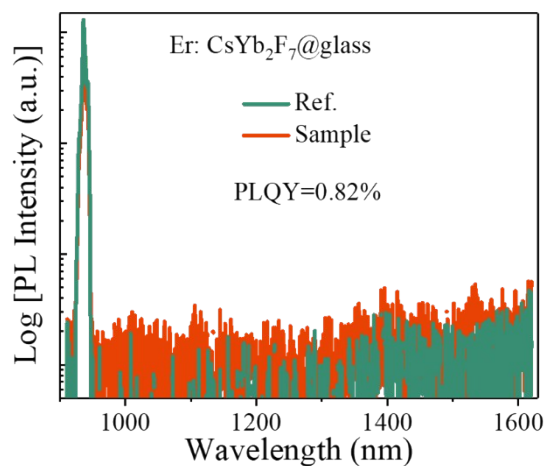

**Fig. S12.** Quantitative NIR PL spectra of Er: CsYb<sub>2</sub>F<sub>7</sub> NCs@glass and the reference for absolute PLQY determination.

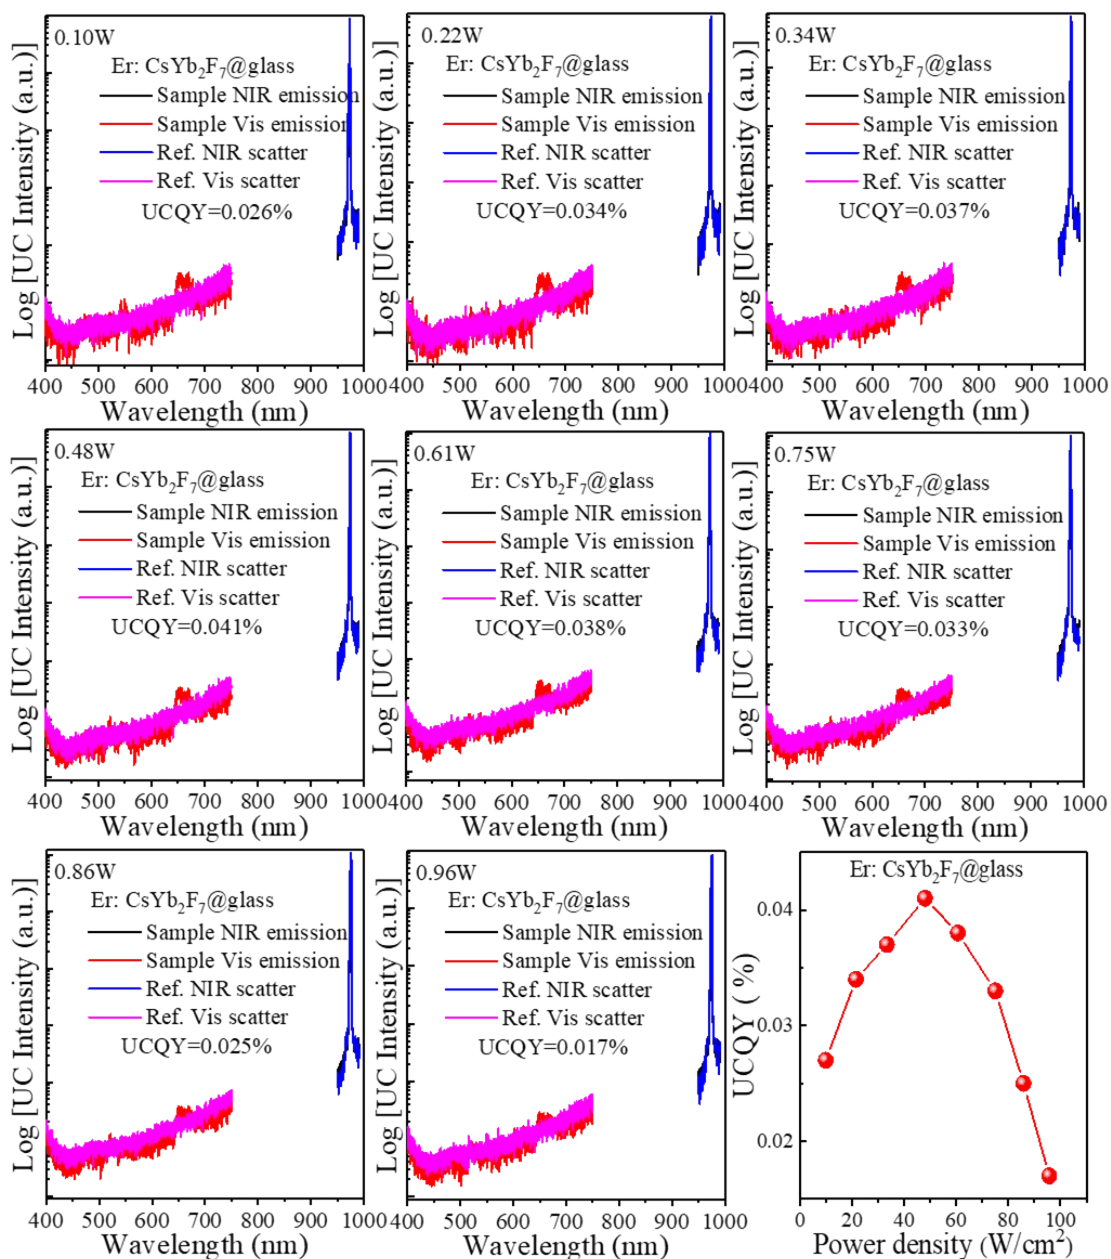

**Fig. S13.** Quantitative UC emission spectra of Er: CsYb<sub>2</sub>F<sub>7</sub> NCs@glass and the reference for UCQY determination by using different laser powers.

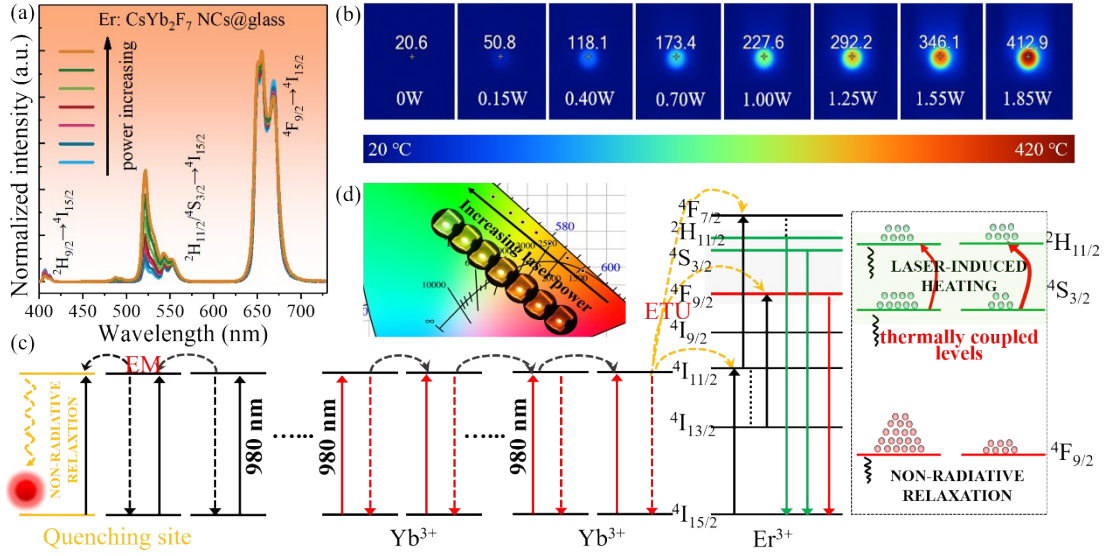

**Fig. S14.** (a) Laser power dependent UC emission spectra of Er: CsYb<sub>2</sub>F<sub>7</sub> NCs@glass sample. All the spectra are normalized to Er<sup>3+</sup>: 656 nm red emissions. (b) Alteration of the actual temperature for the Er: CsYb<sub>2</sub>F<sub>7</sub> NCs@glass sample with the increase of laser power. (c) Schematic illustration of energy transfer processes between Yb-Er couples, ETU and EM represent energy transfer UC and energy migration, respectively. (d) Laser power dependent CIE color coordinates and the corresponding UC luminescence photographs of Er: CsYb<sub>2</sub>F<sub>7</sub> NCs@glass.

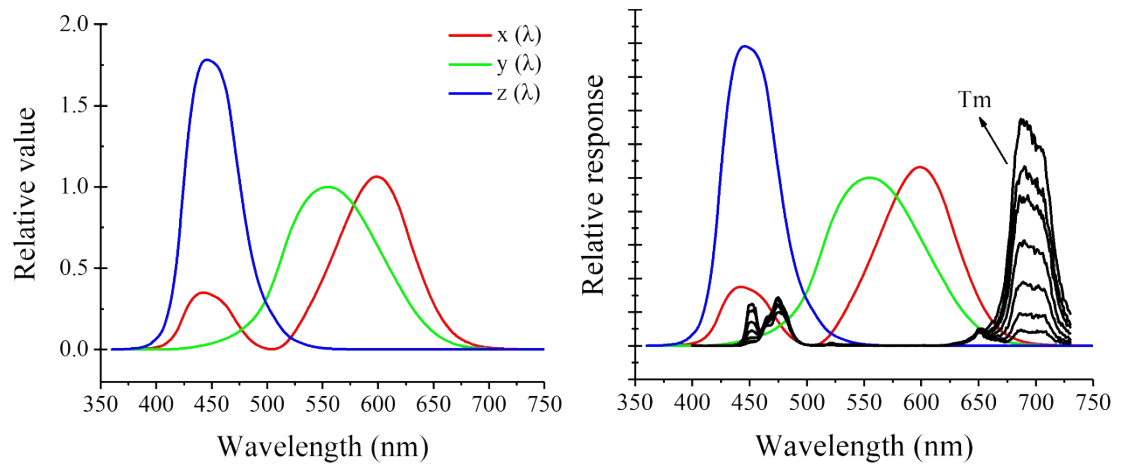

**Fig. S15.** The spectral response of tristimulus values and their response to Tm<sup>3+</sup> emissions.

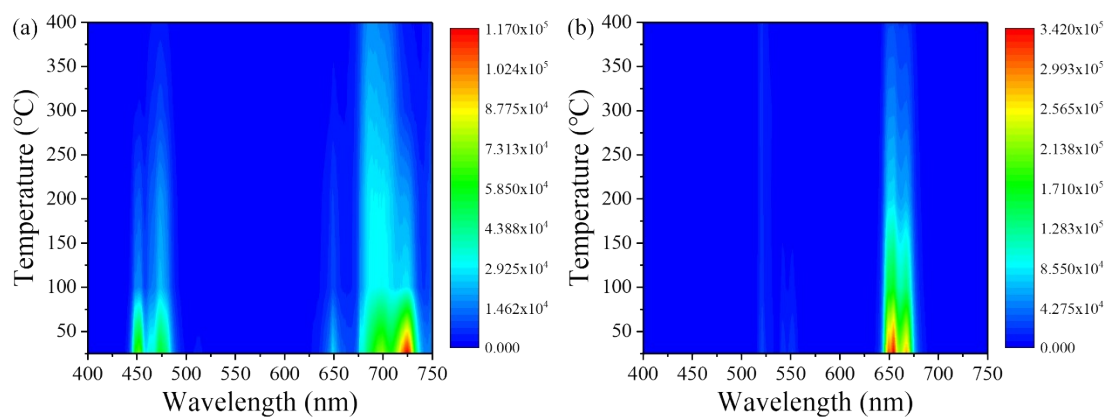

**Fig. S16.** Temperature dependent contour mappings of UC spectra for (a) Tm and (b)

Er: CsYb<sub>2</sub>F<sub>7</sub> NCs@glass samples ( $\lambda_{\text{ex}} = 980 \text{ nm}$ ).

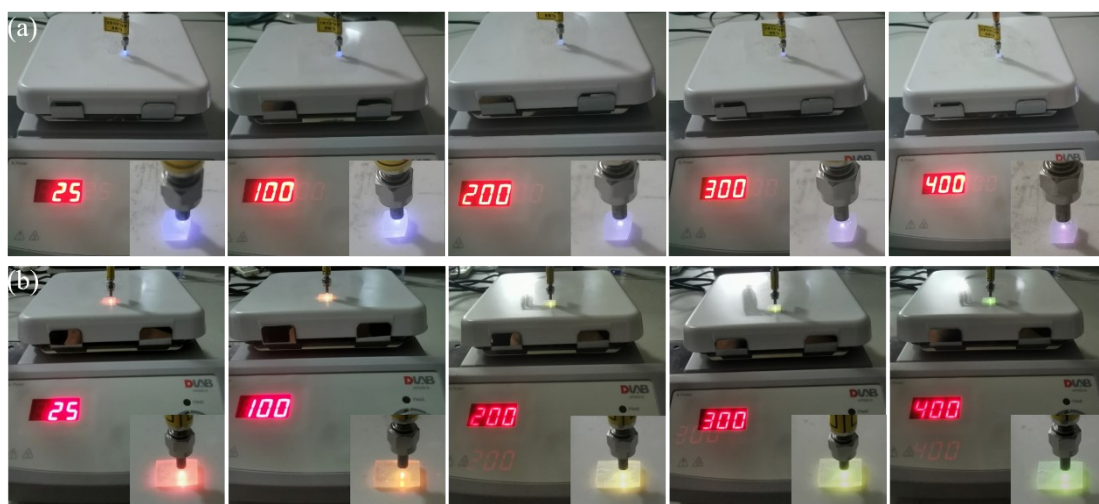

**Fig. S17.** Real-time observation of the change of UC emitting color for (a) Tm: and (b)

Er: CsYb<sub>2</sub>F<sub>7</sub> NCs@glass on a hot plate with elevation of temperature from 25 °C to 400

°C under NIR laser irradiation with a fixed power of 0.4 W.

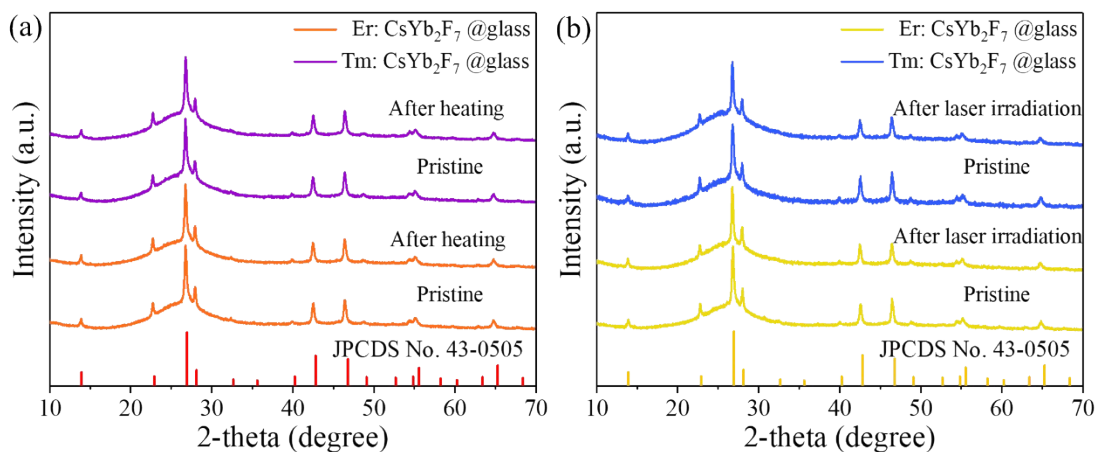

**Fig. S18.** XRD patterns of Tm and Er single-doped  $\text{CsYb}_2\text{F}_7$  NCs@glass. (a) Before and after heating on a hot plate at  $400\text{ }^\circ\text{C}$  for 1 hour and (b) before and after 980 nm laser irradiation (1.85 W) for 30 min.

When irradiated by a 980 nm laser, the focal temperature of the sample rises rapidly through continuous heat accumulation, and reaches heat balance within 2 min. Therefore, after up to 30 min of laser irradiation (1.85 W), the temperature of the sample ( $\sim 400\text{ }^\circ\text{C}$ ) has reached heat balance.

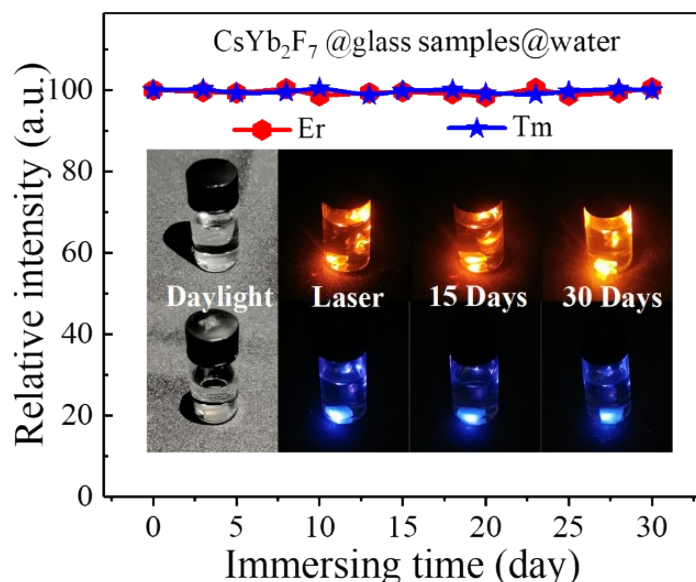

**Fig. S19.** The stability test of Tm-doped and Er-doped  $\text{CsYb}_2\text{F}_7$  NCs@glass samples by directly immersing them in water, showing that the UC intensities remain unchanged after storing in water for 30 days.

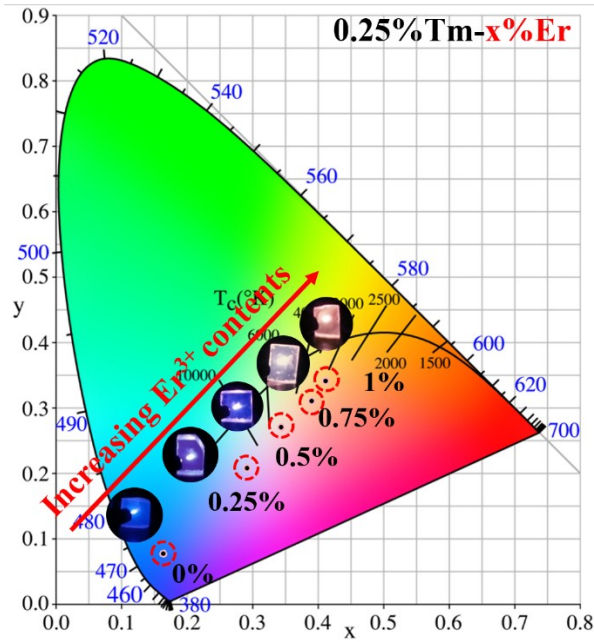

**Fig. S20.** Dependence of CIE color coordinates for a series of Er/Tm ( $x/0.25$ , mol%): CsYb<sub>2</sub>F<sub>7</sub> NCs@glass samples with different Er<sup>3+</sup> doping contents ( $x=0, 0.25, 0.50, 0.75, 1.00$ ).

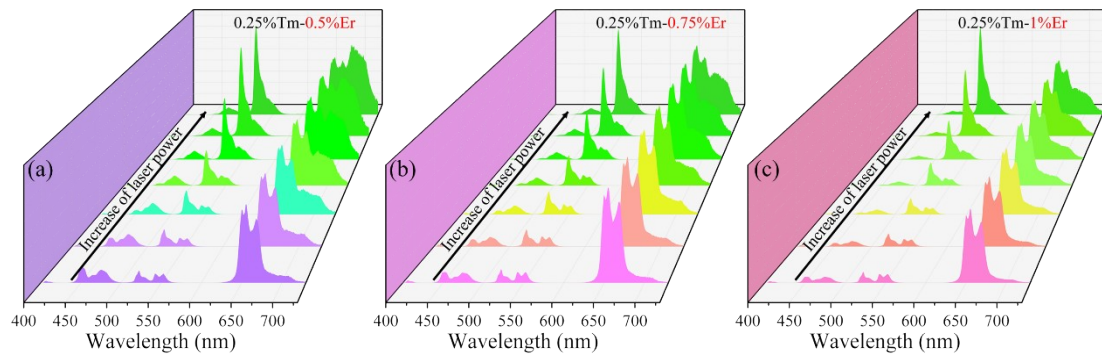

**Fig. S21.** Laser power dependent UC emission spectra for the Er/Tm ( $x/0.25$ , mol%): CsYb<sub>2</sub>F<sub>7</sub> NCs@glass samples, (a)  $x=0.5$ , (b)  $x=0.75$  and (c)  $x=1$ . All the spectra are normalized to Er<sup>3+</sup> 656 nm red emission.



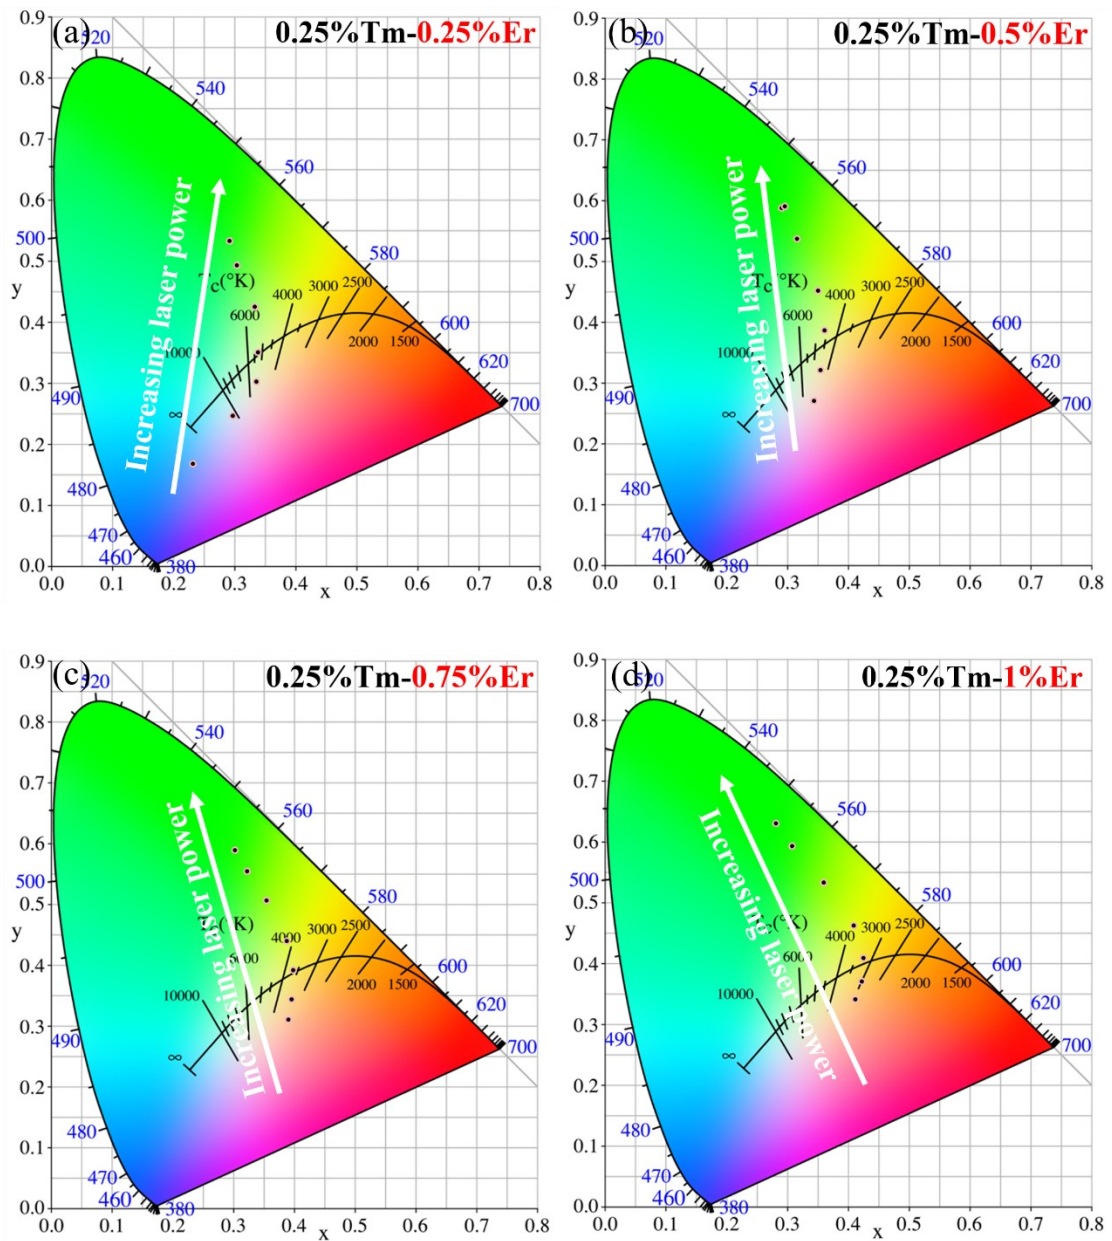

**Fig. S22.** Laser power dependent CIE color coordinates for the Er/Tm ( $x/0.25$ , mol%):

CsYb<sub>2</sub>F<sub>7</sub> NCs@glass samples, (a)  $x=0.25$ , (b)  $x=0.5$ , (c)  $x=0.75$  and (d)  $x=1$ .

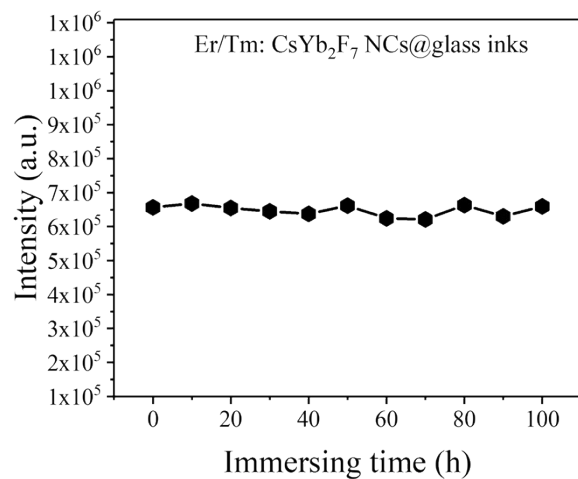

**Fig. S23.** The stability tests on anticounterfeiting patterns by immersing the patterns in water for a certain time, showing almost unchanged of the UC intensity after immersing in water for 100 h.
